# Supplementary material for: Multiple breath washout in bronchiectasis clinical trials: is it feasible?
Source: PubMed Central journal article supplement — ERJ Open Res. 2020 Oct 13;6(4):00363-2019. doi: 10.1183/23120541.00363-2019 (PMC7553113; doi:10.1183/23120541.00363-2019), 2020-10-13
Supplement: 00363-2019.supplement2.pdf [file 00363-2019.supplement2.pdf]

## **Training programme: Multiple Breath Washout using the Exhalyzer® D**

### Summary:

The blended training programme included the use of an eLearning tool and a 1-day face-to-face session. The eLearning tool provided an interactive platform and a variety of media (slideshow presentations, animation, videos demonstrations) on MBW testing for learning, as well as providing a point of contact and social media platform ([www.MBWtraining.com](http://www.MBWtraining.com))<sup>9</sup>. Participants were requested to use the eLearning tool and read key references at least 1 week prior to attending the training day. The 1-day programme was formulated using materials and published Standard Operating Procedure (SOP) developed by the North American MBW Training Centre (<http://lab.research.sickkids.ca/ratjen/mbw-centre/>) (permission granted). The 1-day face-to-face programme consisted of a 2-hour presentation session on theory including content from the eLearning tool and 5 1/2 hours of hands on calibration and testing and data quality control (training programme outline below). Programme participants were also shown how to navigate the eLearning tool including the video library demonstrations.

## **Training programme: Multiple Breath Washout using the Exhalyzer® D**

### **1 day operational training programme**

**Location: NICRF, Belfast**

**Contact: k.oneill@qub.ac.uk**

This training agenda outline is adopted from the outline developed by the European MBW Central Training and Over-Reading Centre, Royal Brompton Hospital and Imperial College London.

**Preparation:** Before attending participants will:

- Complete pre programme evaluation via email
- Complete 1 full day independent learning using materials sent by Belfast and eLearning tool materials

### **Agenda**

|       |       |                                                                      |
|-------|-------|----------------------------------------------------------------------|
| 09.00 | 09.15 | Welcome and Introductions                                            |
| 09.15 | 09.45 | MBW physiology overview                                              |
| 09.45 | 10.15 | Equipment                                                            |
| 10.15 | 10.45 | Introduction to Practical session - calibration and system settings  |
| 10.45 | 11.15 | Move to hands on sessions – equipment orientation                    |
| 11.15 | 13.00 | Hands on calibration                                                 |
| 13.00 | 13.30 | Lunch – Orientation to the eLearning tool for online training videos |
| 13.30 | 16.30 | Hands on testing/synchronisation                                     |
| 16.30 | 17.30 | Art of testing / Quality Control.                                    |
| 17.30 | 18.00 | MBW certification. Completion of post programme evaluation           |

### **Post programme**

Participants will receive

- An email detailing the instructions for qualification
- USB pen drive containing key references, SOP, quick reference guides, instruction and documents for submission of tests to over reading site.
