# Supplementary material for: Multiple breath washout in bronchiectasis clinical trials: is it feasible?
Source: PubMed Central journal article supplement — ERJ Open Res. 2020 Oct 13;6(4):00363-2019. doi: 10.1183/23120541.00363-2019 (PMC7553113; doi:10.1183/23120541.00363-2019), 2020-10-13
Supplement: 00363-2019.supplement4.pdf [file 00363-2019.supplement4.pdf]

Please complete the evaluation

- before pre-reading,
- before the 1 day training programme
- after the 1 day training programme.

This evaluation is used to assess the effectiveness of our training programme. It allows you to assess your baseline knowledge and confidence and reflect on changes at the end of the programme.

### **Knowledge evaluation**

**Please answer the following 10 multiple choice questions.**

**1. Lung Clearance Index (LCI) is derived from**

- a) Single breath washout test
- b) Multiple breath washout test
- c) Body plethysmography test
- d) Diffusion capacity test

Please select one correct answer

**2. LCI is a measure of**

- a) Airflow
- b) Perfusion
- c) Inflammation
- d) Gas mixing efficiency

Please select one correct answer

**3. LCI is a useful measure because**

- a) It reflects the small airways as well as the large airways
- b) It can be used across all ages
- c) It is effort independent
- d) All of the above

Please select one correct answer

**4. LCI is calculated as**

- a) The number of functional residual capacity (FRC) lung turnovers required to washout a tracer gas
- b) The concentration of tracer gas at functional residual capacity
- c) The mean concentration of CO<sub>2</sub> at end tidal volume
- d) The number of lung regions ventilated

Please select one correct answer

**5. The upper limit of normal for LCI is**

- a) 10
- b) 5.5
- c) 7.5
- d) 15.5

Please select one correct answer

**6. LCI is a measure which is most informative in**

- a) Patients with advanced disease
- b) Patients awaiting transplant
- c) Healthy individuals
- d) Children and patients with mild disease

Please select one correct answer

**7. The Ecomedics Exhalyzer D is**

- a) A closed circuit system that uses resident N<sub>2</sub> gas as the inert tracer gas.
- b) An open circuit system that uses resident N<sub>2</sub> gas as the inert tracer gas.
- c) An open circuit system that uses O<sub>2</sub> as the inert tracer gas.
- d) An open circuit system that SF<sub>6</sub> gas as the inert tracer gas.

Please select one correct answer

**8. There are 3 parts to obtaining a successful washout test**

- a) Establishing a regular breathing pattern
- b) Performing a forced expiratory manoeuvre
- c) Beginning washout
- d) Ending washout
- e) A short period of breath hold

Please select 3 correct answers

**9. Washout is complete when**

- a) End tidal N<sub>2</sub> concentration reaches the target end tidal N<sub>2</sub> concentration for 3 consecutive breaths
- b) End tidal N<sub>2</sub> concentration reaches the target end tidal N<sub>2</sub> concentration for 10 consecutive breaths
- c) Washout data has been collected for at least 10 minutes
- d) End tidal N<sub>2</sub> concentration reaches < 2 %

Please select one correct answer

**10. LCI reference ranges are dependent on**

- a) Age
- b) Method of analysis
- c) Software used
- d) Equipment used
- e) All of the above

Please select one correct answer

## **Confidence evaluation**

**Please score the following 6 questions which relate to your confidence with the Multiple Breath Washout procedure to obtain LCI**

Rate your confidence **setting up the Exhalyzer D equipment**

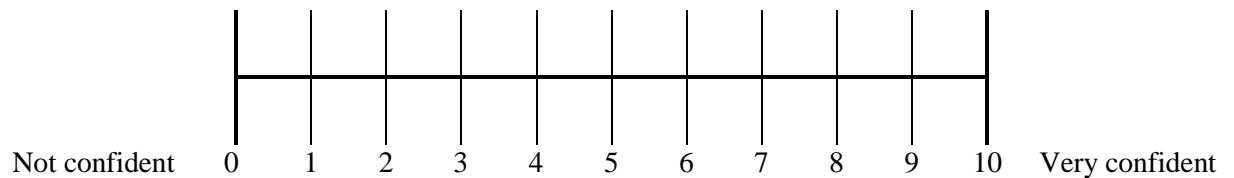

Rate your confidence **performing the calibration procedures**

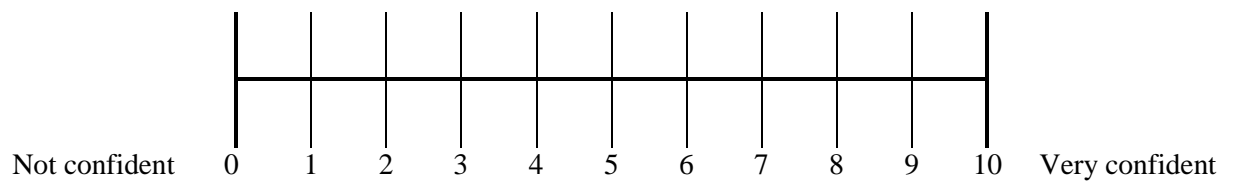

Rate your confidence **preparing the patient to do a MBW test**

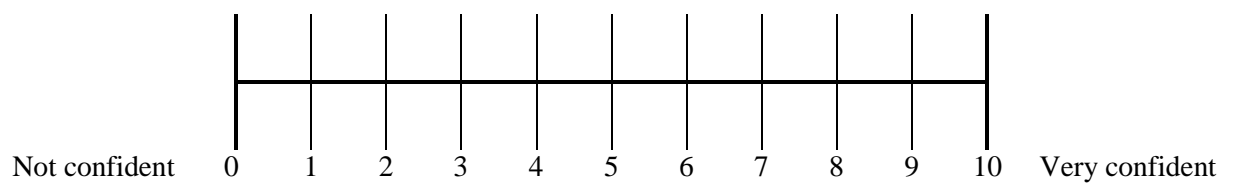

Rate your confidence **performing the MBW test**

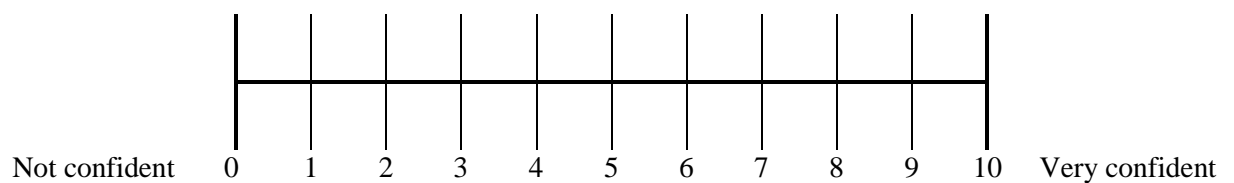

Rate your confidence **quality checking the MBW test**

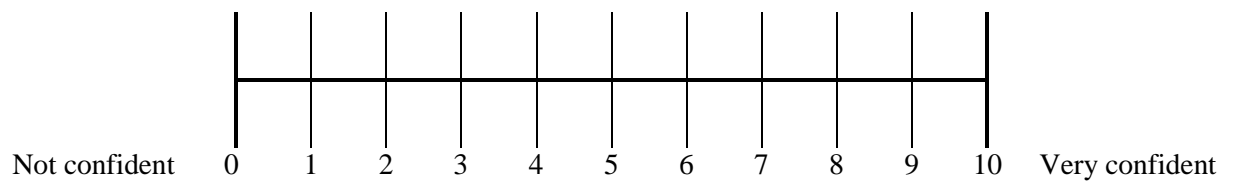

Rate your confidence **interpreting the LCI result**

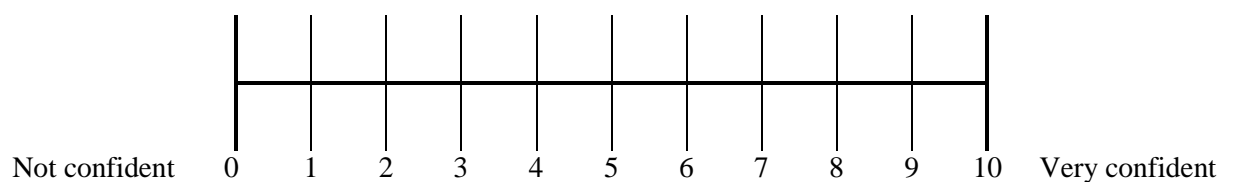

After training programme:

**Do you foresee any barriers to completing MBW certification on your return to site?**

(For example; Time to practice, identifying subjects to obtain practice tests, lack of support/awareness of the value of MBW testing, equipment related issues, room/space related issues, support for queries/troubleshooting, issues with sending practice tests to over reading centre).

Please use the space provided to comment.

**Thank you for completing this evaluation.**
