# Supplementary material for: Multiple breath washout in bronchiectasis clinical trials: is it feasible?
Source: PubMed Central journal article supplement — ERJ Open Res. 2020 Oct 13;6(4):00363-2019. doi: 10.1183/23120541.00363-2019 (PMC7553113; doi:10.1183/23120541.00363-2019), 2020-10-13
Supplement: 00363-2019.supplement6.pdf [file 00363-2019.supplement6.pdf]

## Appendix 6: Participant knowledge and confidence questionnaire scores pre and post training programme

|                               | Median (IQR) score        |                              |                            | Mean (SD) change in paired scores      |         |                                        |         |
|-------------------------------|---------------------------|------------------------------|----------------------------|----------------------------------------|---------|----------------------------------------|---------|
|                               | Pre-programme<br>¶ (n=45) | Start of programme<br>(n=49) | End-of programme<br>(n=55) | Pre to start programme<br>(n=40 pairs) | p-value | Start to end programme<br>(n=49 pairs) | p-value |
| Knowledge (Score out of 10)   | 6.0 (5.0-8.0)             | 7.0 (6.0-8.8)                | 9.0 (8.0-10.0)             | 1.4 (2.3)*                             | 0.001*  | 1.5 (1.6)*                             | <0.001* |
| Confidence (Score out of 60)^ | 1.0 (0.0-14.5)            | 12.0 (0.5-25.0)              | 45.0 (40.0-48.0)           | 5.0 (9.0)*                             | 0.002*  | 30.0 (15.0)*                           | <0.001* |

¶ pre-training before receiving preparation material

^total score out of 60 from 6 VAS

\*statistically significant  $p < 0.05$
