# Supplementary material for: Multiple breath washout in bronchiectasis clinical trials: is it feasible?
Source: PubMed Central journal article supplement — ERJ Open Res. 2020 Oct 13;6(4):00363-2019. doi: 10.1183/23120541.00363-2019 (PMC7553113; doi:10.1183/23120541.00363-2019), 2020-10-13
Supplement: 00363-2019.supplement7.pdf [file 00363-2019.supplement7.pdf]

**Appendix 7: Results from key aspects of programme evaluation.**

| Programme                         | Evaluation question                                                                                  | N (%) rating<br>“strongly agree” or<br>“agree” |
|-----------------------------------|------------------------------------------------------------------------------------------------------|------------------------------------------------|
| Overall                           | Overall how would you rate the Nitrogen Washout Training Session (rating excellent or very good)*    | 52/52 (100%)                                   |
| Theory presentations              | The session met the stated objectives                                                                | 51/52 (98%)                                    |
|                                   | During the theory sessions, I was given the opportunity to ask questions                             | 51/52 (98%)                                    |
|                                   | The presentations were an appropriate length                                                         | 48/52 (92%)                                    |
|                                   | The process for MBC certification were clearly presented                                             | 50/52 (96%)                                    |
|                                   | The theory presentations were appropriate for my knowledge level                                     | 51/52 (98%)                                    |
|                                   | The theory presentations appropriately prepared me for the hands on calibration and testing sessions | 51/52 (98%)                                    |
|                                   | The process for MBW certification were clearly presented in the theory presentations                 | 50/52 (96%)                                    |
| Hands-on sessions:<br>Calibration | The session met the stated objectives                                                                | 51/52 (98%)                                    |
|                                   | The session allowed each participant to ask questions                                                | 51/52 (98%)                                    |
|                                   | The responses to my questions were appropriate and helpful                                           | 51/52 (98%)                                    |
|                                   | The calibrations were explained according to the SOP                                                 | 51/52 (98%)                                    |
|                                   | The hands on session was an appropriate length                                                       | 48/52 (92%)                                    |
|                                   | The calibrations were explained appropriately for my knowledge level                                 | 51/52 (98%)                                    |
|                                   | The session allowed each participant the opportunity to practice calibration                         | 51/52 (98%)                                    |
|                                   | Calibration troubleshooting was appropriately explained                                              | 51/52 (98%)                                    |
|                                   | The session met the stated objectives                                                                | 51/52 (98%)                                    |

|                            |                                                                                                                  |              |
|----------------------------|------------------------------------------------------------------------------------------------------------------|--------------|
| Hands-on sessions: Testing | The session allowed each participant to ask questions                                                            | 51/52 (98%)  |
|                            | The responses to my questions were appropriate and helpful                                                       | 51/52 (98%)  |
|                            | Testing was explained according to the SOP                                                                       | 50/52 (96%)  |
|                            | The hands on session was an appropriate length                                                                   | 50/52 (96%)  |
|                            | Testing was explained appropriately for my knowledge level                                                       | 51/52 (98%)  |
|                            | The session allowed each participant the opportunity to practice doing a MBW test on the Eco Medics Exhaylzer D® | 50/52 (96%)  |
|                            | MBW test troubleshooting was appropriately explained                                                             | 51/52 (98%)  |
|                            | MBW testing events (cough, sigh, leaks etc.) were appropriately identified and explained                         | 51/52 (98%)  |
| Other                      | How knowledgeable were the training staff (rating extremely or very)*                                            | 51/52 (98%)  |
|                            | Would you recommend this training to colleagues (rating yes)*                                                    | 52/52 (100%) |

When asked how the training programme could be improved, 5/52 (9.6%) participants thought the programme contained too much information to cover in one day, with some suggesting that it would be better if it was longer in duration. Five of 52 participants (9.6%, only 1 the same) would have liked more time spent on hands-on practice, including the opportunity to practice on patients in addition to healthy volunteers. Two out of 52 participants (3.8%) thought that more time should be spent explaining signal synchronisation calibration, 1/52 (1.9%) requested more information on cleaning the equipment, 1/52 (1.9%) requested more information on set-up of the equipment and 1/52 (1.9%) requested more information on results interpretation.
