# Supplementary material for: Multiple breath washout in bronchiectasis clinical trials: is it feasible?
Source: PubMed Central journal article supplement — ERJ Open Res. 2020 Oct 13;6(4):00363-2019. doi: 10.1183/23120541.00363-2019 (PMC7553113; doi:10.1183/23120541.00363-2019), 2020-10-13
Supplement: 00363-2019.supplement8.pdf [file 00363-2019.supplement8.pdf]

## **Appendix 8**

### Potential barriers to completing MBW certification as reported by the participants

Nineteen participants from 11 sites commented. Potential barriers included a lack of time to complete certification (11/19), a lack of available volunteers and patients to practice testing (7/19), a lack of available space or suitability of space for equipment (6/19), a lack of local support (5/19), and lack of knowledge and recall of training (2/19). This information was used to work with sites to minimise these barriers in the certification phase (e.g. tips to identify volunteers, liaison with engineer to assist equipment set-up, regular calls for re-fresher information). The majority (9/11) of sites reporting issues went on to successfully complete certification with only 2 of these failing to complete.
